# Supplementary material for: Ab initio calculation of halide ligand passivation on PbSe quantum dot facets
Source: Royal Society of Chemistry journal article supplement (doi:10.1039/c6ra21668d), 2016-01-01
Supplement: c6ra21668d1.pdf [file c6ra21668d1.pdf]

## Supporting Information

| Crystallographic Orientation | 001   | 110   | 111-Pb |
|------------------------------|-------|-------|--------|
| Pb (82)                      | 0.81  | 0.80  | 0.59   |
| Pb (82)                      | 0.81  | 0.80  | 0.59   |
| Se(Pb for 111) (34)(82)      | -0.78 | -0.75 | 0.59   |
| Se(Pb for 111) (34)(82)      | -0.78 | -0.75 | 0.59   |

*Table 1 Bader charges of atoms at top layer of the slab represents pristine PbSe surfaces. Positive number indicates loss of charges while negative means gaining charges.*

| Crystallographic Orientation | 001   | 110   | 111-Pb |
|------------------------------|-------|-------|--------|
| Pb (82)                      | 0.81  | 0.77  | 0.68   |
| Pb (82)                      | 0.90  | 0.85  | 0.73   |
| Se(Pb for 111) (34)(82)      | -0.73 | -0.69 | 0.73   |
| Se(Pb for 111) (34)(82)      | -0.73 | -0.62 | 0.73   |

*Table 2 Bader charges of atoms at top layer of the with 25% coverage of Iodine ligand attached on PbSe surfaces. Positive number indicates loss of charges while negative means gaining charges.*

| Ligand DOS contribution near Fermi level over total DOS |       |
|---------------------------------------------------------|-------|
| I                                                       | 18.1% |
| Br                                                      | 15.6% |
| Cl                                                      | 13.4% |

*Table 3 Ligand DOS contribution near Fermi level over total DOS within energy bandwidth of 1.5kT from the valence band maxima*

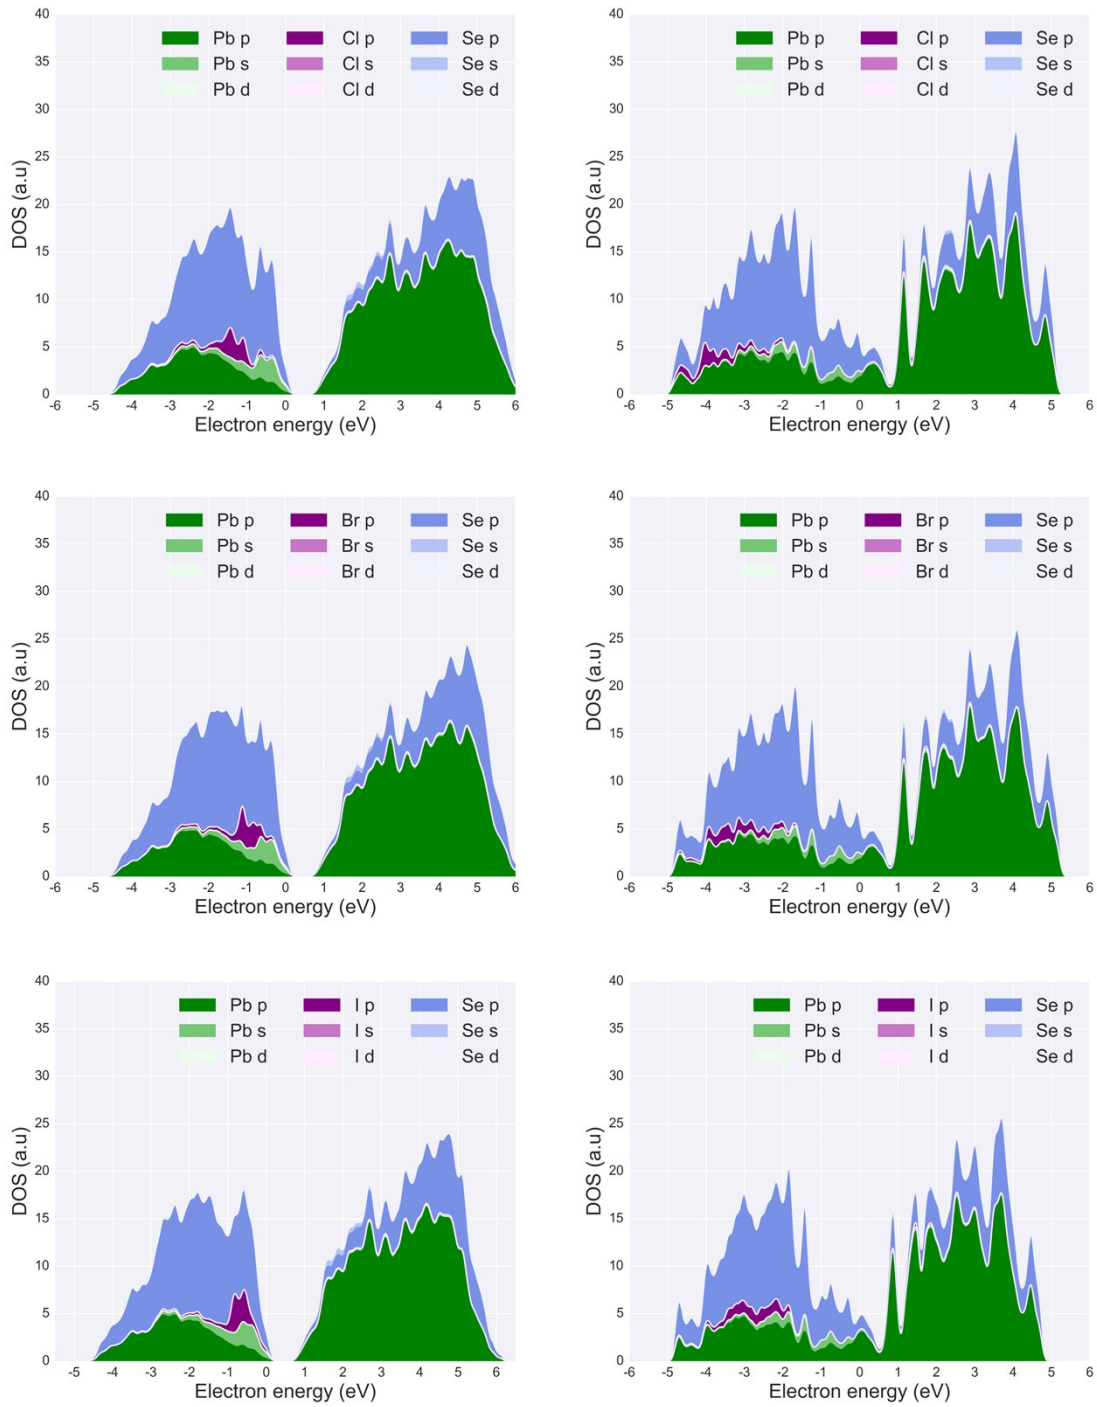

Figure 1 Projected DOS of PbSe (110) and (111) surfaces with three different halide ligands. (top-left: Chlorine on (110) plane, top-right: Chlorine on (111) plane, middle-left: Bromine on (110) plane; middle-right: Bromine on (111) plane, bottom-left: Iodine on (110) plane, bottom-right: Iodine (110) plane.)

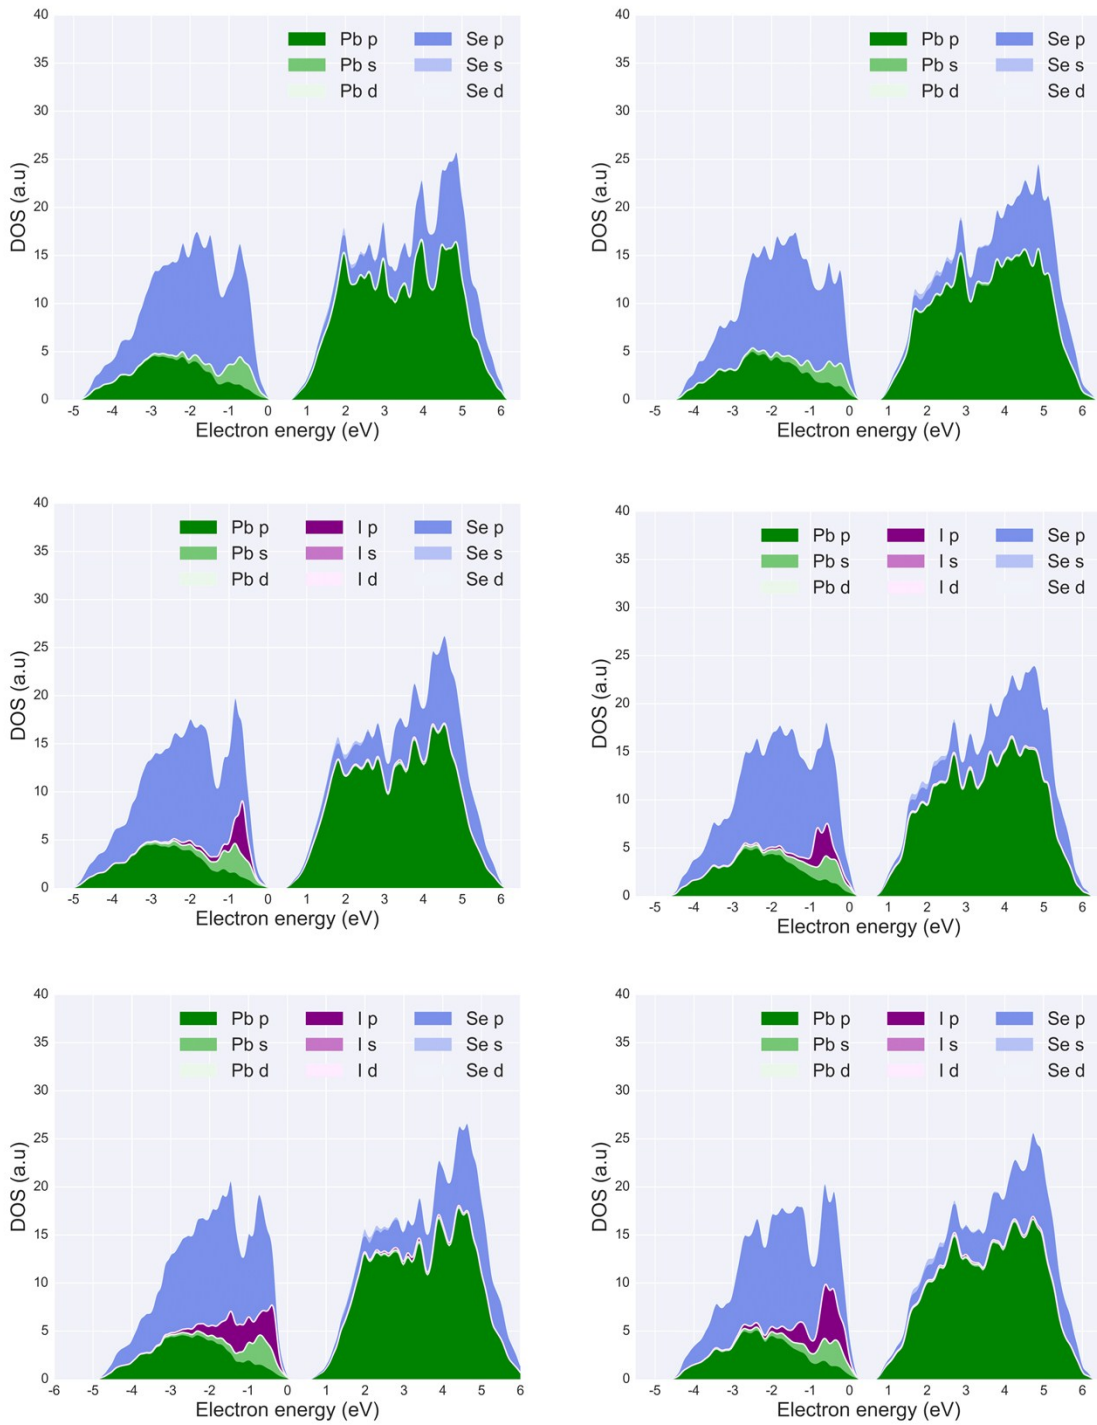

*Figure 2 Projected DOS of PbSe (001) and (110) surfaces with three different coverages of iodine ligands. (top-left: 0% for (001) plane, middle-left: 25% for (001) plane, bottom-left: 50% for (001) plane; top-right: 0% for (110) plane, middle-right: 25% for (110) plane, bottom-right: 50% for (110) plane.)*

Rough estimation of Dipole with ligand coverage changes:

Assumptions:

1. Adding more ligands to surfaces the relative distances of each effective charges do not change much.
2. The surface charge is condensed to a point charge as in 1D consideration.

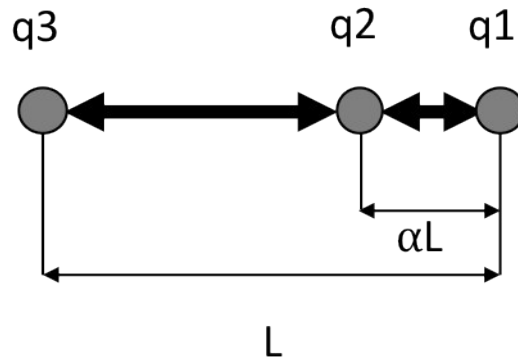

Figure 3 schematic diagram of dipole moment of PbSe (111) surface with iodine ligand passivated.  $q_1$  represents effective charges of ligands,  $q_2$  represents the effective charges of first lead atom layer and  $q_3$  represents the rest of charges in the slab.

Then we can have a rough calculation of dipole moment of the system as following:

$$\text{Dipole Moment} = L * D = L * |q_1 - (1 - \alpha) * q_2|$$

After substitute alpha with different numbers, we generated

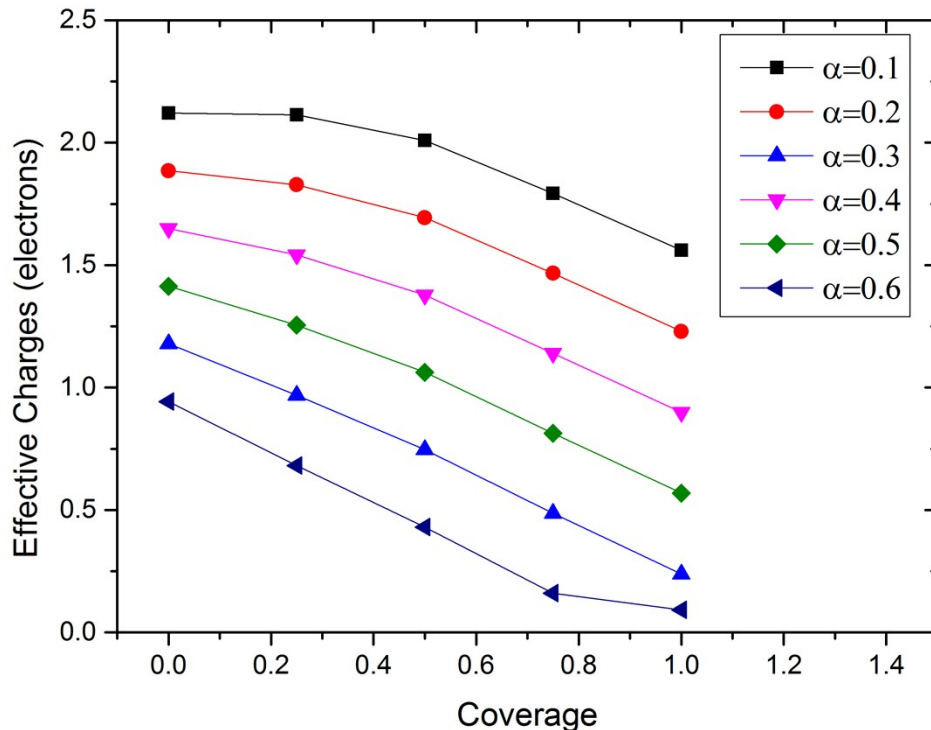

Figure 4 Change of dipole moment of PbSe (111) surface with iodine ligand passivated at different level of coverage. In this work alpha should be around 0.2.
